# Supplementary material for: Serum Amyloid A is not obligatory for high-fat, high-sucrose, cholesterol-fed diet-induced obesity and its metabolic and inflammatory complications
Source: PubMed Central journal article supplement (PMC9015120; doi:10.1371/journal.pone.0266688), 2022-04-18

11/11/11  
K-0010  
1:5000  
1:15,200  
K-0010

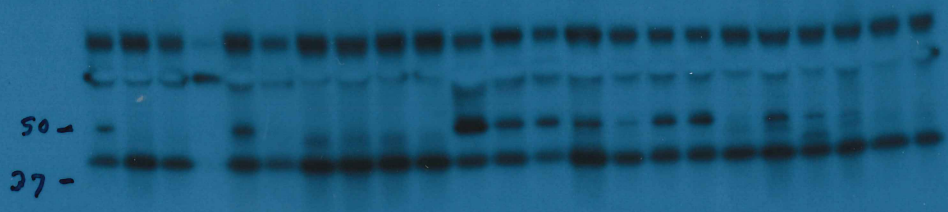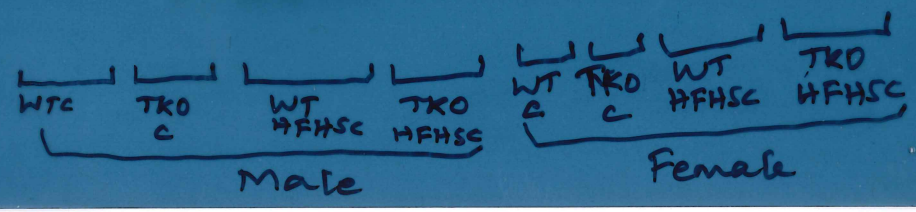

Scrb9 pad extract exp 022720

12/8/21

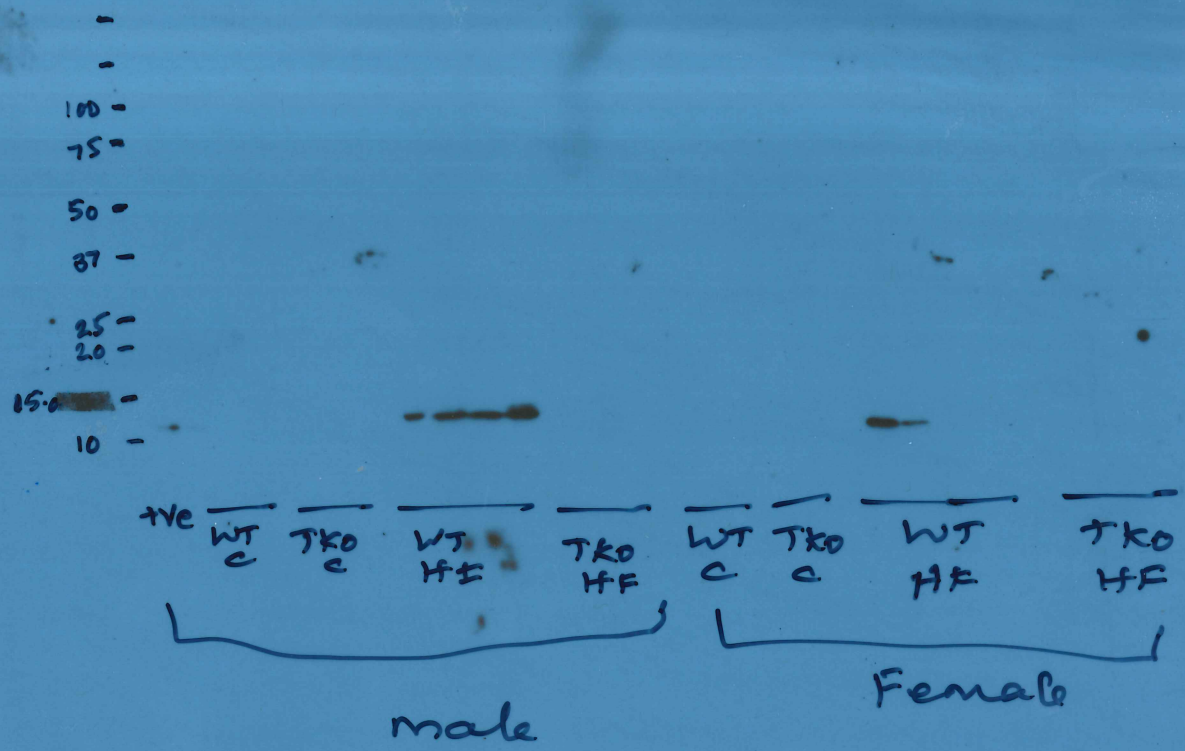

Advanced ECL - 10 min

1:1000 Abcam Anti SAA

1:25,000 anti Rb

EXP 022720

Date: 12/7/21

Subq Fat extract

| Well | Sample                | 50µg              | Buffer                     | 4 X SDS (µl) | Load (µl)    |
|------|-----------------------|-------------------|----------------------------|--------------|--------------|
|      |                       | [Protein] (µg/µl) | Protein (µg) / Volume (µl) |              |              |
| 1    | mol wt markers        | -                 | -                          | -            | 15 µl        |
| 2    | ± VE C (TgFSAA 1µl)   |                   | 1                          | 14           | 5 µl / 15 µl |
| 3    | WT-C #1               |                   | 8.9                        | 6.1          |              |
| 4    | " #2                  |                   | 12.5                       | 2.5          |              |
| 5    | " #3                  |                   | 11.3                       | 3.7          |              |
| 6    | TKO-C #7              |                   | 11.0                       | 4.0          |              |
| 7    | " #8                  |                   | 8.1                        | 6.9          |              |
| 8    | " #9                  |                   | 11.7                       | 3.3          |              |
| 9    | WT-HFHSC #12 (Leaked) |                   | 10.1                       | 4.9          |              |
| 10   | " #12                 |                   | 10.1                       | 4.9          |              |
| 11   | " #14                 |                   | 11.1                       | 3.9          |              |
| 12   | " #15                 |                   | 10.9                       | 4.1          |              |
| 13   | TKO-HFHSC #16         |                   | 18.6                       | -            |              |
| 14   | " #17                 |                   | 15.3                       | -            |              |
| 15   | " #19                 |                   | 11.5                       | 3.5          |              |
| 16   | WTC #26               |                   | 10.4                       | 4.6          |              |
| 17   | " #27                 |                   | 9.3                        | 5.7          |              |
| 18   | TKOC #32              |                   | 8.4                        | 6.6          |              |
| 19   | " #33                 |                   | 8.3                        | 6.7          |              |
| 20   | WT-HFHSC #36          |                   | 18.9                       | 0            |              |
| 21   | " 37                  |                   | 15.9                       | 0            |              |
| 22   | " 38                  |                   | 13.5                       | 1.5          |              |
| 23   | TKO-HFHSC #41         |                   | 18.4                       | -            |              |
| 24   | " #42                 |                   | 20.3                       | -            |              |
| 25   | " 43                  |                   | 20.2                       | -            |              |
| 26   |                       |                   |                            |              |              |

5-20% SDS

4-18% GGE

Other:

Reduced

Non-Reduced

Boil Samples

DO NOT BOIL

Abcam SAA

Coomassie

Transfer:

1° = 1:10000      2° = 1:25,000

Antisubst

ARG for \_\_\_\_\_

Gel label/orientation

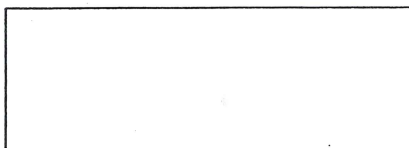

Supplement: pone.0266688.s007.pdf [file pone.0266688.s007.pdf]
