# Supplementary material for: Serum Amyloid A is not obligatory for high-fat, high-sucrose, cholesterol-fed diet-induced obesity and its metabolic and inflammatory complications
Source: PubMed Central journal article supplement (PMC9015120; doi:10.1371/journal.pone.0266688), 2022-04-18
Supplement: pone.0266688.s008.pdf [file pone.0266688.s008.pdf]

12/01/21

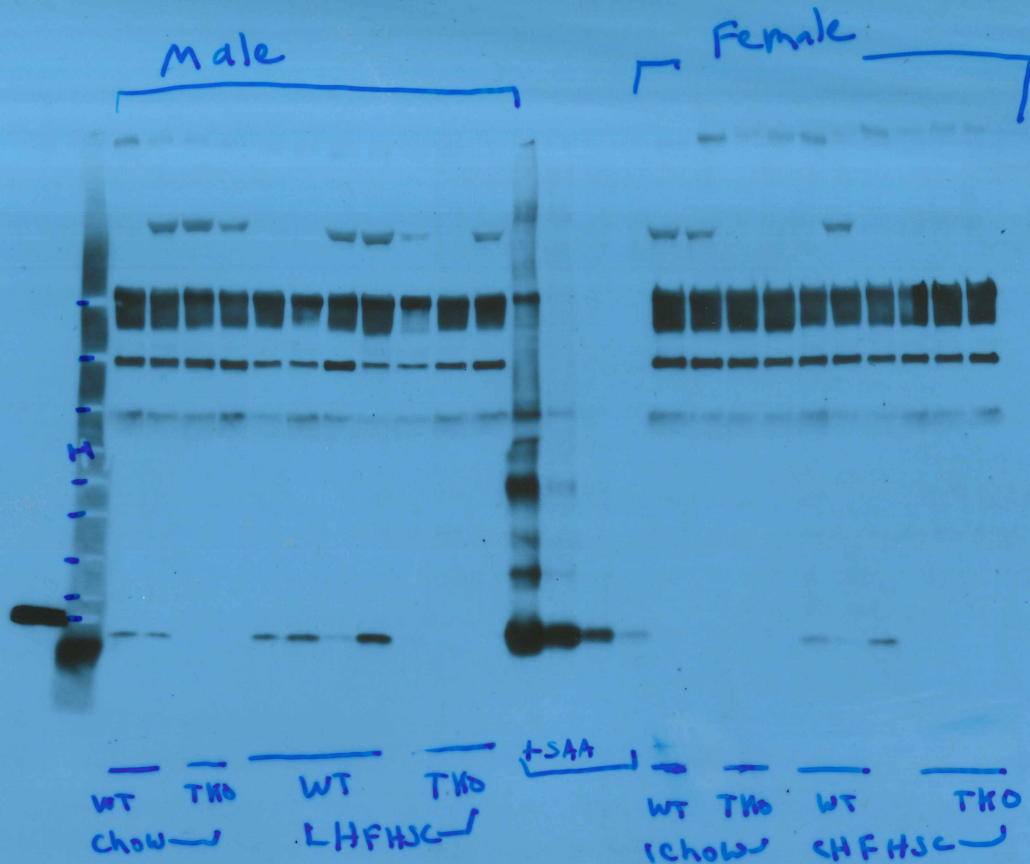

Run 200V 39 min  
 Transfer 100V 38 min  
 10 O/N 4°C

Rbdms SAA3 sherer  
 1:1000

+ Rbdms SAA1/2 abcam  
 1:1,000 (99033)

- Wash 1x

2° α Rb HRP 1:10,000  
 1hr RT

~~Block~~ - Wash 1x

No Boil No Reduce

ECU  
 2ml

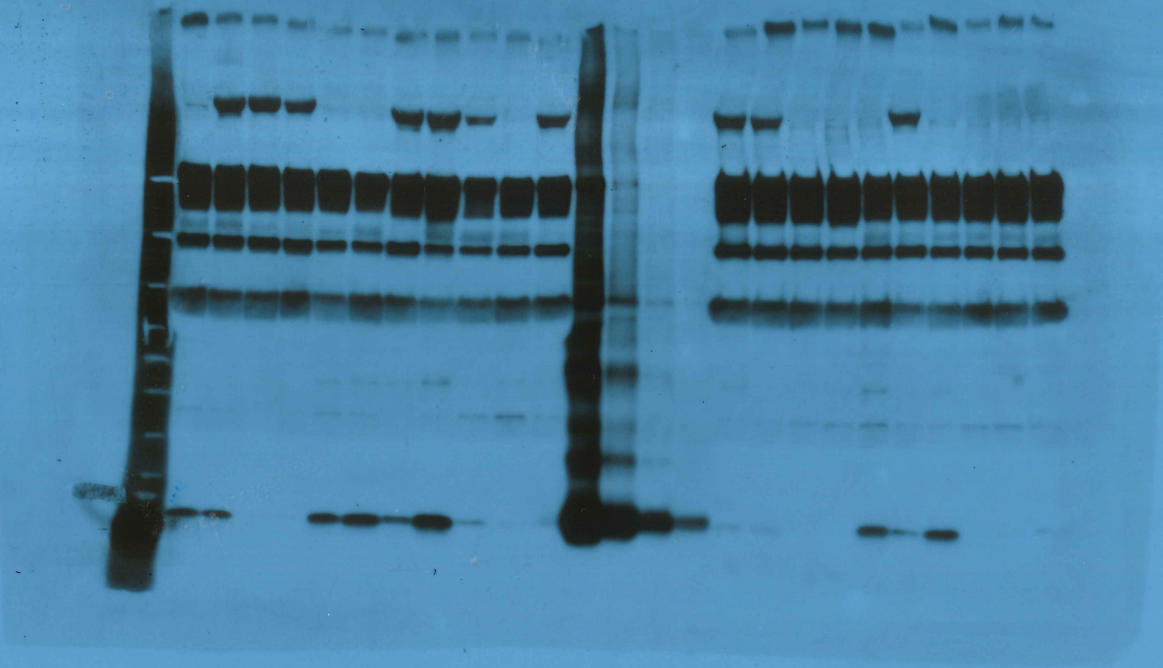

11

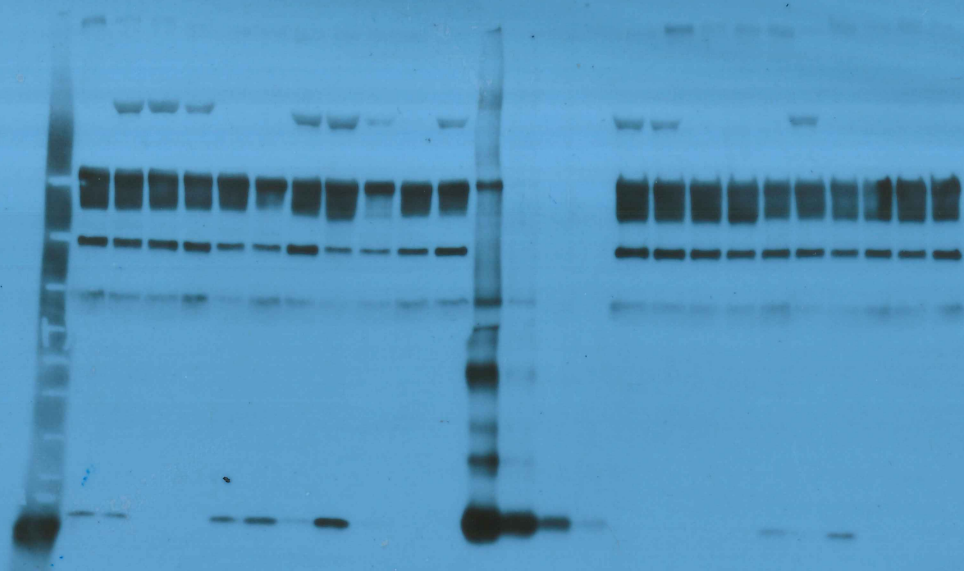

ECU  
1m

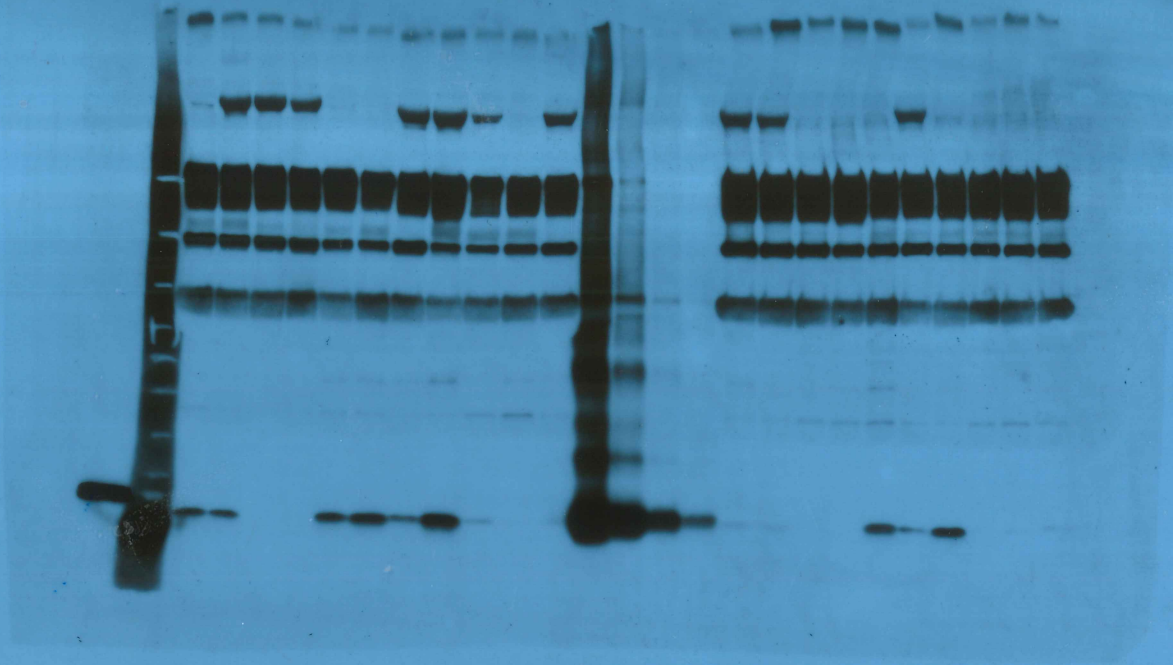

ECL 5 min

| Well | Sample       | [Protein]<br>( $\mu\text{g}/\mu\text{l}$ ) | Protein<br>( $\mu\text{g}$ ) | Volume<br>( $\mu\text{l}$ ) | 2 X<br>SDS ( $\mu\text{l}$ ) | Load<br>( $\mu\text{l}$ ) |
|------|--------------|--------------------------------------------|------------------------------|-----------------------------|------------------------------|---------------------------|
| 1    | Ladder       |                                            |                              |                             |                              |                           |
| 2    | #3 wtchow M  |                                            |                              |                             |                              | 15                        |
| 3    | #4           |                                            |                              | 3                           | 27                           | 10                        |
| 4    | #8 TKO chow  |                                            |                              |                             |                              |                           |
| 5    | #9           |                                            |                              |                             |                              |                           |
| 6    | #11 WT HF    |                                            |                              |                             |                              |                           |
| 7    | #12          |                                            |                              |                             |                              |                           |
| 8    | #14          |                                            |                              |                             |                              |                           |
| 9    | #15          |                                            |                              |                             |                              |                           |
| 10   | #16 TKO HF   |                                            |                              |                             |                              |                           |
| 11   | #18          |                                            |                              |                             |                              |                           |
| 12   | #19          |                                            |                              |                             |                              |                           |
| 13   | SAAAPA       |                                            |                              |                             |                              |                           |
| 14   | " B see back |                                            |                              | 2                           | 8                            | 10                        |
| 15   | " C "        |                                            |                              | 2                           | 8                            | 10                        |
| 16   | " D "        |                                            |                              | 2                           | 8                            | 10                        |
| 17   | #27 WTchow F |                                            |                              | 2                           | 8                            | 10                        |
| 18   | #29 " "      |                                            |                              |                             |                              |                           |
| 19   | #32 TKO chow |                                            |                              |                             |                              |                           |
| 20   | #33 " "      |                                            |                              |                             |                              |                           |
| 21   | #37 WT HF    |                                            |                              |                             |                              |                           |
| 22   | #38 WT HF    |                                            |                              |                             |                              |                           |
| 23   | #39          |                                            |                              |                             |                              |                           |
| 24   | #41 TKO HF   |                                            |                              |                             |                              |                           |
| 25   | #43          |                                            |                              |                             |                              |                           |
| 26   | #44          |                                            |                              |                             |                              |                           |

5-20% SDS

4-18% GGE

Other:

Reduced

Non-Reduced

Boil Samples

DO NOT BOIL

Coomassie

Transfer:

1° =

2° =

ARG for

*Rbams SAA 1/2 ab 199030  
1:10000  
+ RbSMA5 Scherer  
1:11000  
d Rb HRP  
1:10,000  
1/1*

Gel label/orientation

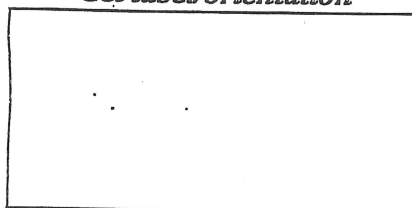

APms plasma. ~~B + 27ml~~

A APms Plasma → ~~2ml~~ 2ml

B ↪ 10ml A + 30 2xSD = 2ml

↪ 10ml B + 30 2xSD = 2ml

↪ 10ml C + 30 2xSD = 2ml

↪

4/10
